# Supplementary material
Source: Springer Nature journal article supplement (https://www.springermedizin.de/resource/supplementary/12967_2011_831_MOESM8_ESM.pdf/9577132)

# WB anti-SCGF

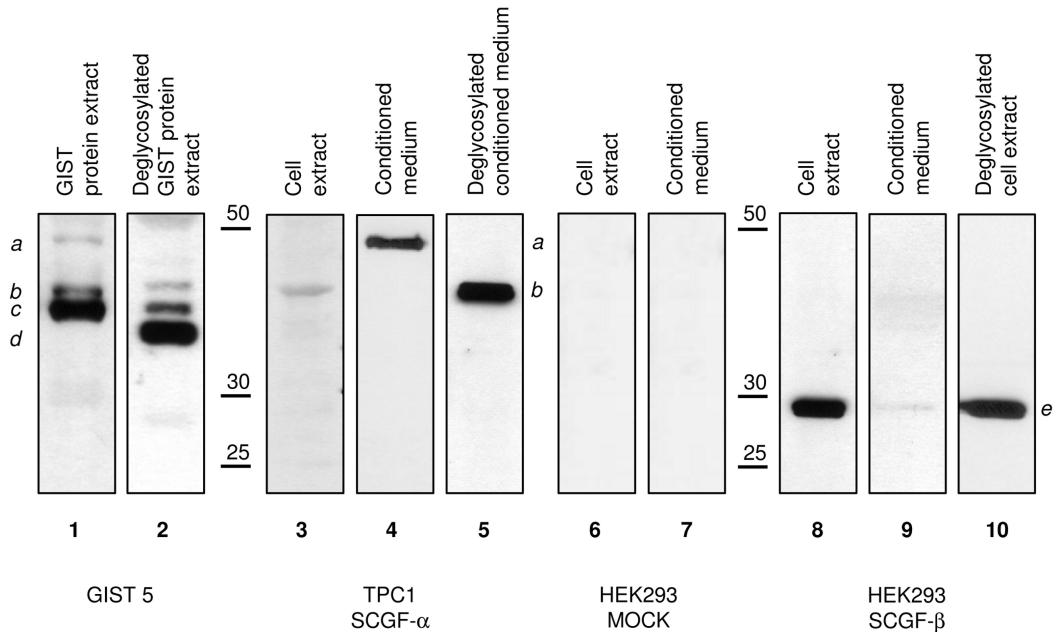

Supplement: MOESM8 [file 9577132]
